# Supplementary material
Source: publisher figshare collection journal article supplement (https://karger.figshare.com/ndownloader/files/23581874)
Supplement: Supplementary file 1 [file 23581874]

Supplementary Table. 2. Primer sequences of real-time qPCR

| Gene | Forward/Reverse | Sequence (5’→3’) |
| --- | --- | --- |
| human SEMA3C | Forward | GTGGGAGTGGCGCTTTCAGTC |
| Reverse | AGCAGCGTCCTTTTCCAGATTCAC |
| human PLXNA2 | Forward | GCCTGTCCCCATCGATGATA |
| Reverse | CTTGCCACTCTTAGTCCCCA |
| human PLXNB1 | Forward | CGTGCCATGTCAACTCCTCC |
| Reverse | GTGTGGGGTTCAGTGTTGCA |
| human PLXND1 | Forward | TGAGCGTTACTGGCAGAAGA |
| Reverse | GGAGGAACACTTGGGGAAGA |
| human 18s rRNA | Forward | GTCGGCGTCCCCCAACTTCT |
| Reverse | CGTGCAGCCCCGGACATCTA |
